# Supplementary material for: Aerosol-assisted route to low-E transparent conductive gallium-doped zinc oxide coatings from pre-organized and halogen-free precursor
Source: Royal Society of Chemistry journal article supplement (doi:10.1039/d0sc00502a), 2020-01-01
Supplement: d0sc00502a4.pdf [file d0sc00502a4.pdf]

$^{13}\text{C}$  NMR ("EtZnOiPr")<sub>n</sub>

68.81

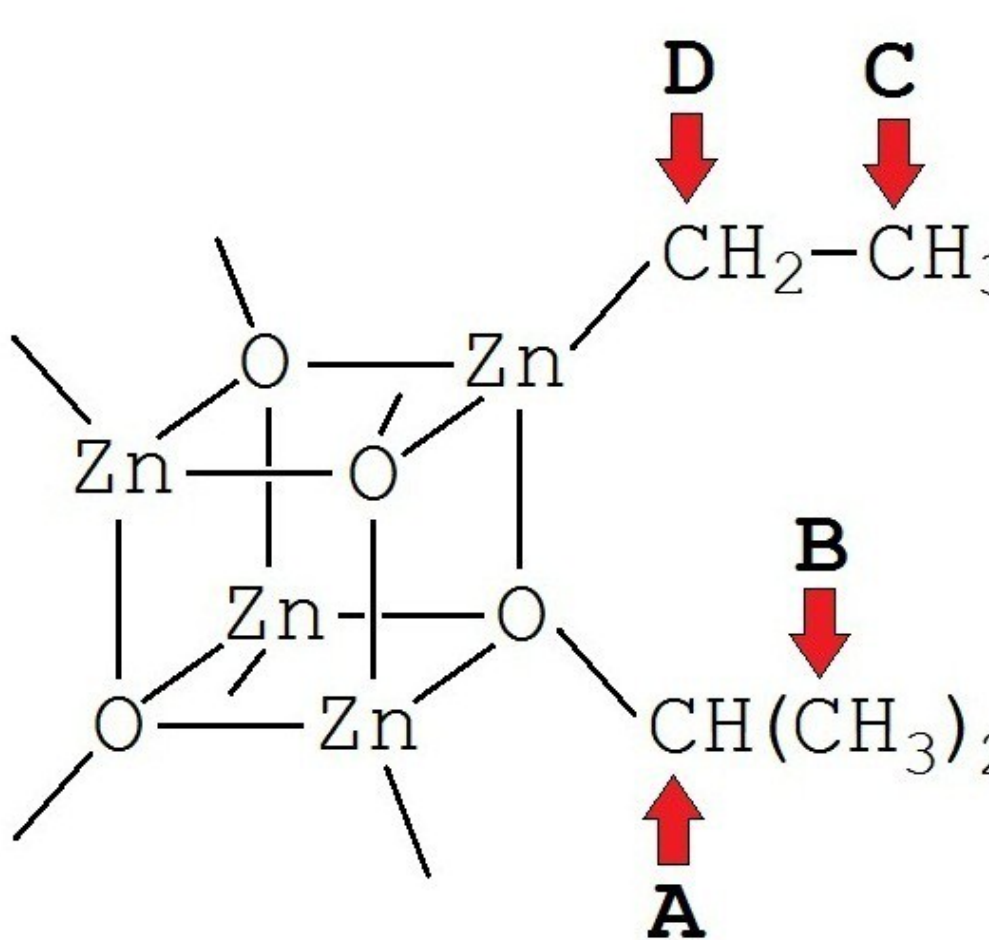

- A** - CH (68.81 ppm)
- B** - CH<sub>3</sub> (27.19 ppm)
- C** - CH<sub>3</sub> (12.86 ppm)
- D** - CH<sub>2</sub> (1.68 ppm)
- E** - iPrOH (25.64 ppm)
- F** - Ethane (7.05 ppm)

27.19

25.54

**B**

12.86

7.01

1.68

```

SOLVENT          C6D6
NS                320
DS                4
SWH              41666.668 Hz
FIDRES           1.275380 Hz
AQ               0.7840800 sec
RG               203
DW               12.000 usec
DE               7.95 usec
TE               298.0 K
D1               2.00000000 sec
D11              0.03000000 sec
TD0              64
SFO1             176.1207579 MHz
NUC1              13C
P0               4.00 usec
P1              12.00 usec
PLW1             64.79000092 W
SFO2             700.3528014 MHz
NUC2              1H
CPDPRG[2]        waltz16
PCPD2            65.00 usec
PLW2            12.20199966 W
PLW12            0.73934001 W
PLW13            0.37228999 W
    
```

```

F2 - Processing parameters
SI                131072
SF                176.1030703 MHz
WDW               EM
SSB               0
LB                1.00 Hz
GB                0
PC                1.40
    
```

**A**

**C**

**D**

**E**

**F**

70 65 60 55 50 45 40 35 30 25 20 15 10 5 ppm
