# Supplementary material for: Aerosol-assisted route to low-E transparent conductive gallium-doped zinc oxide coatings from pre-organized and halogen-free precursor
Source: Royal Society of Chemistry journal article supplement (doi:10.1039/d0sc00502a), 2020-01-01

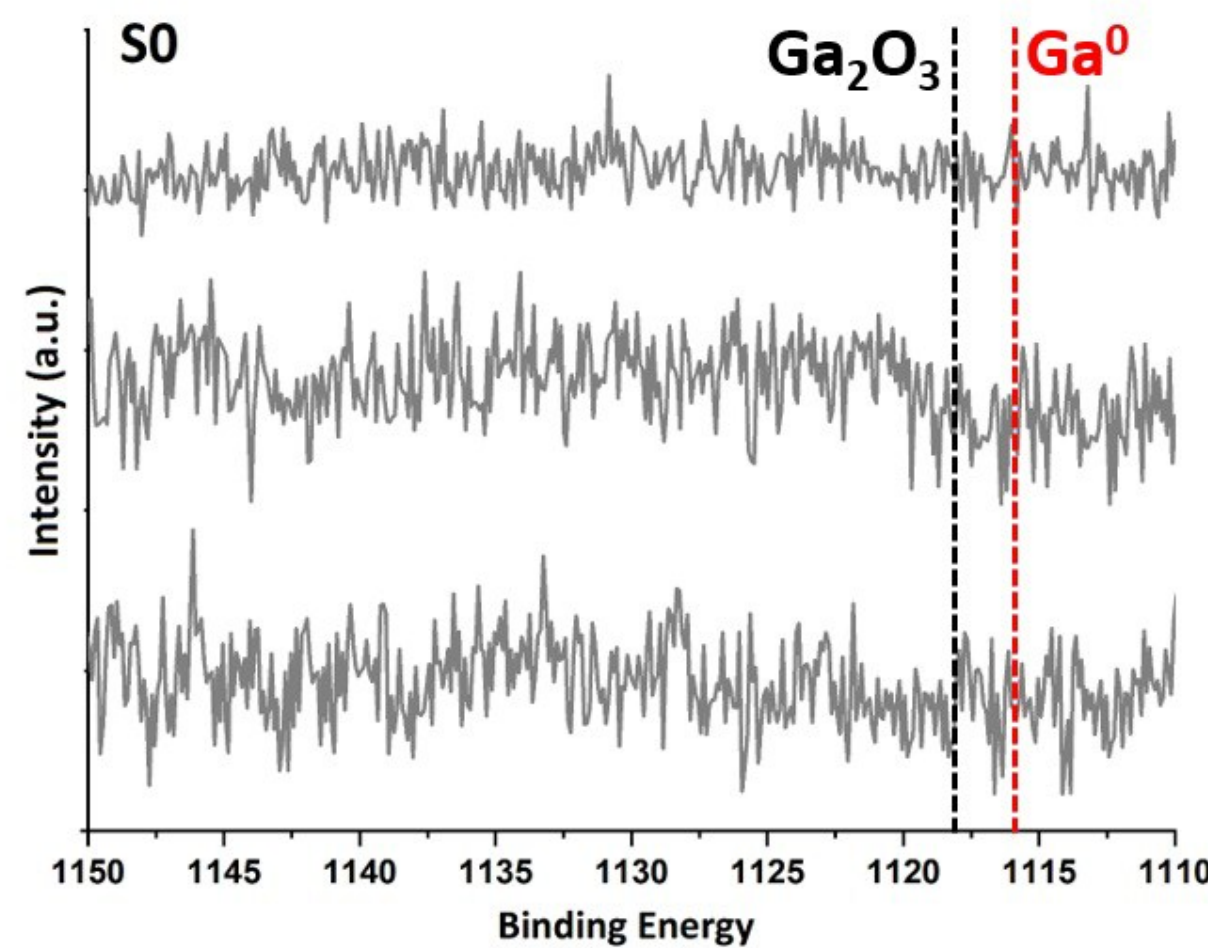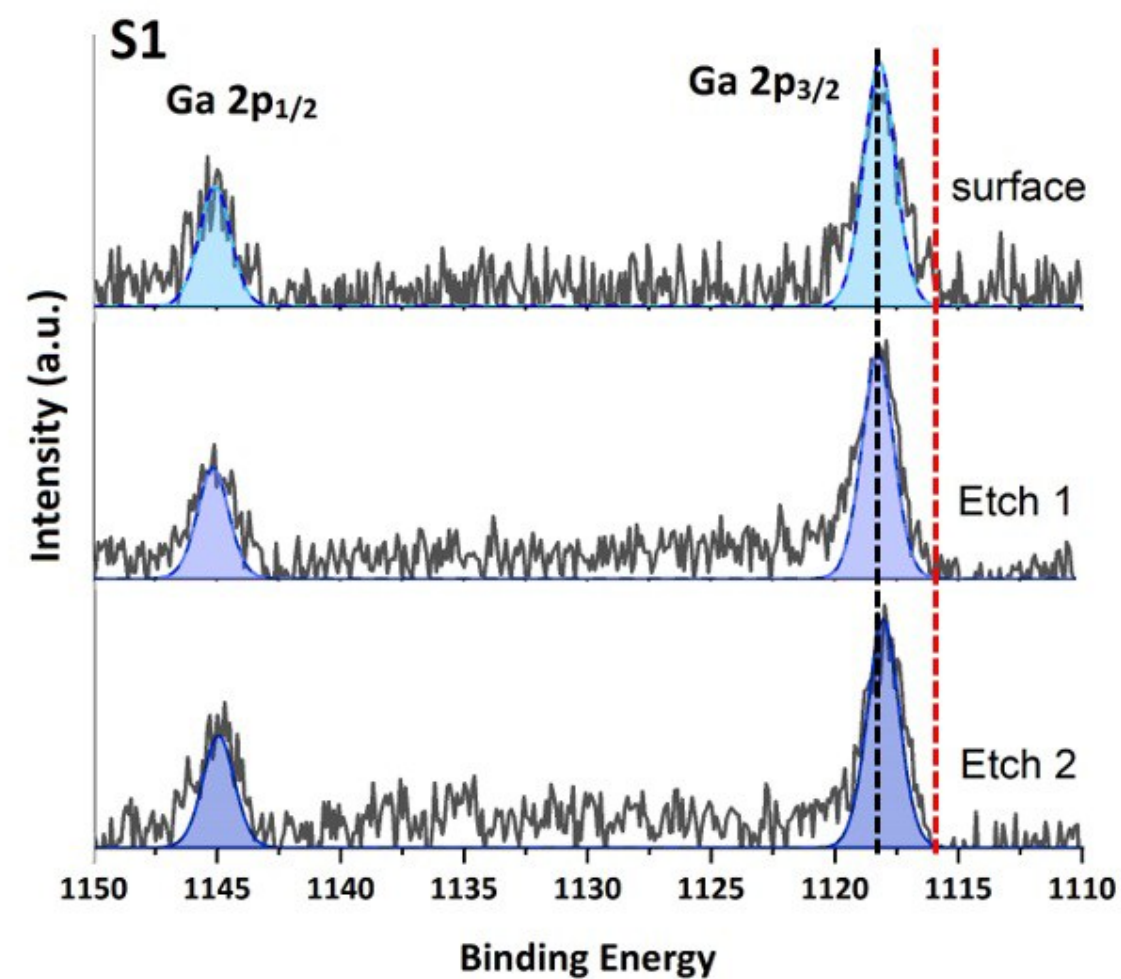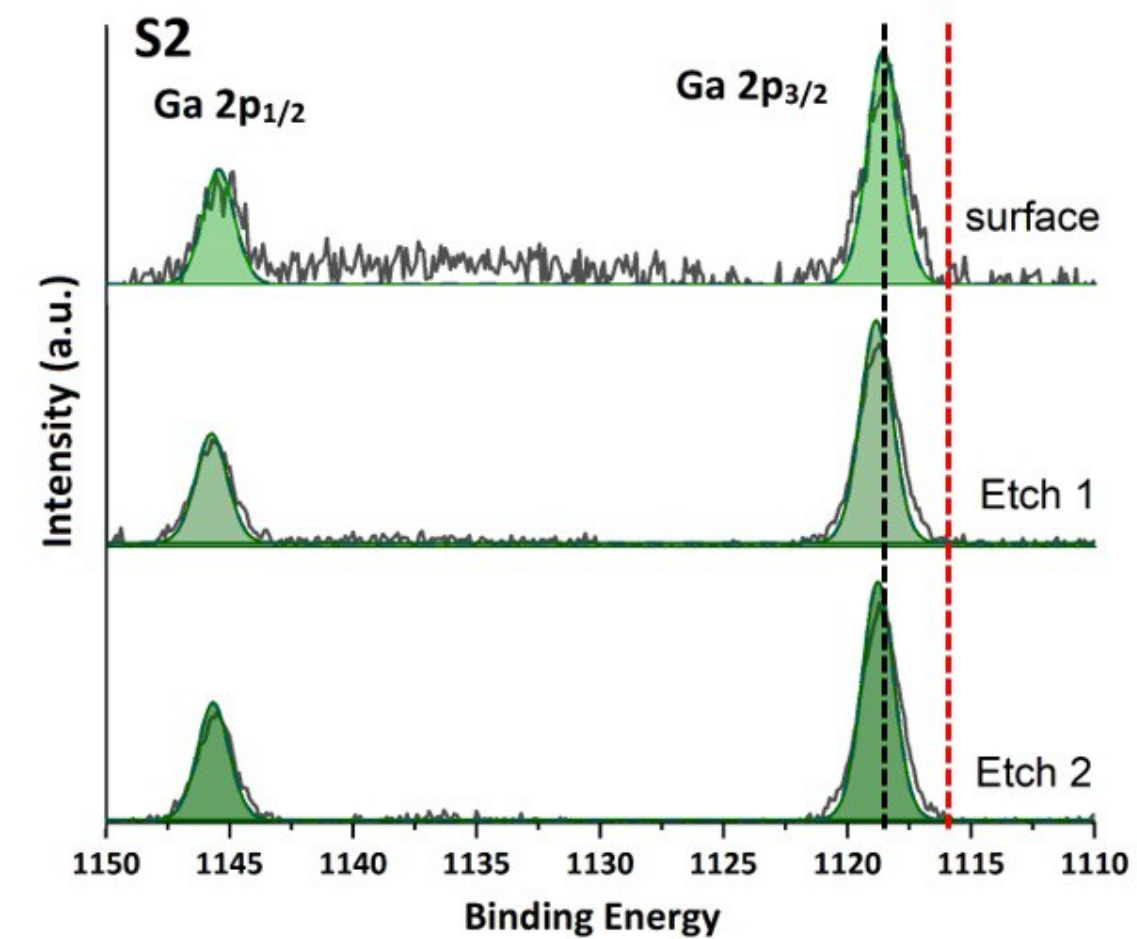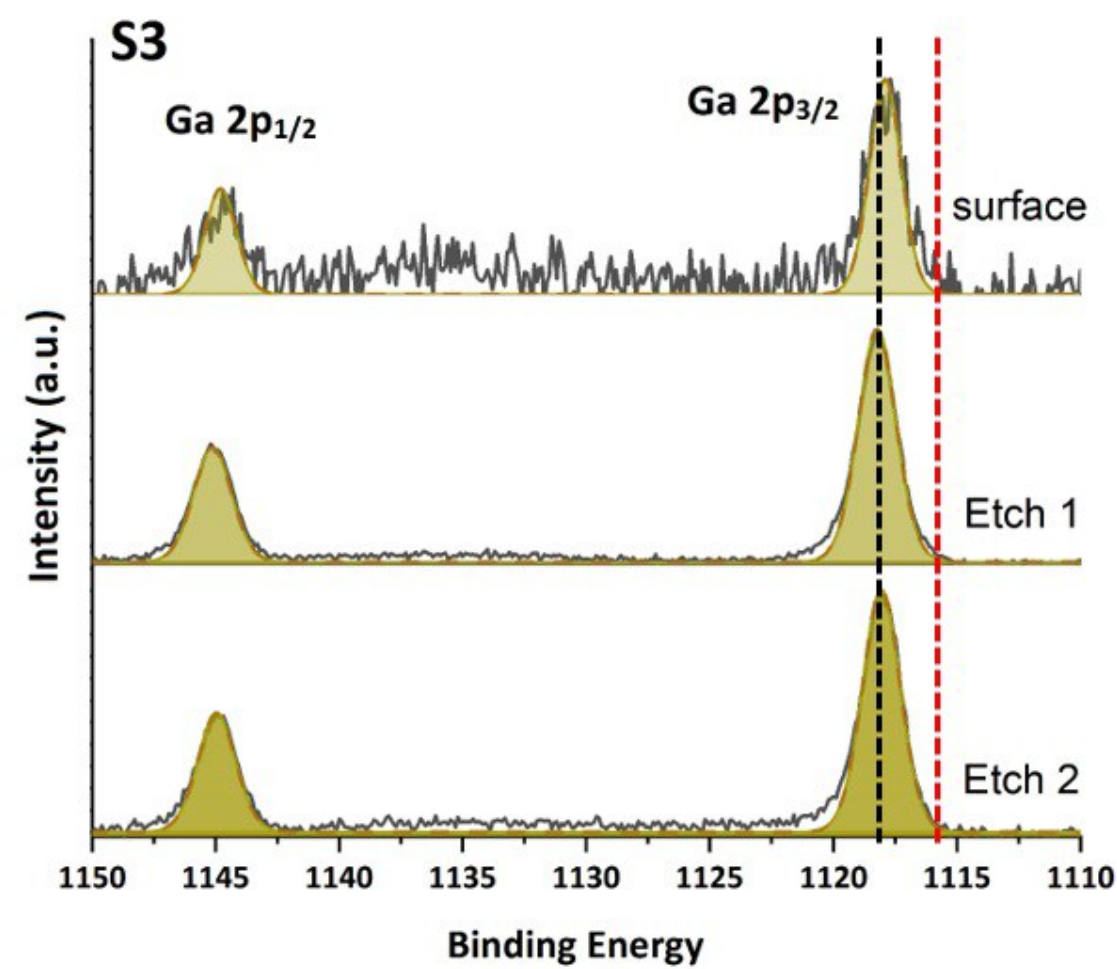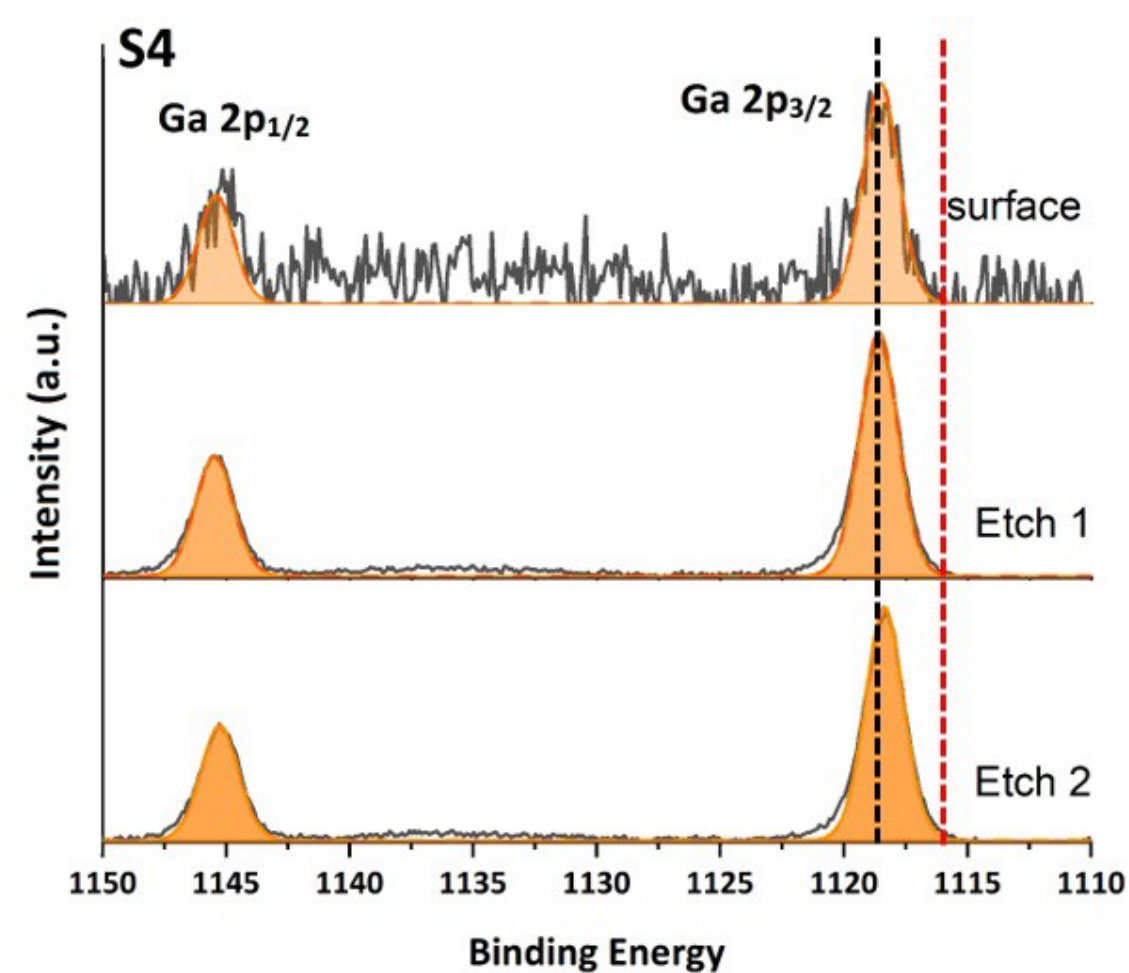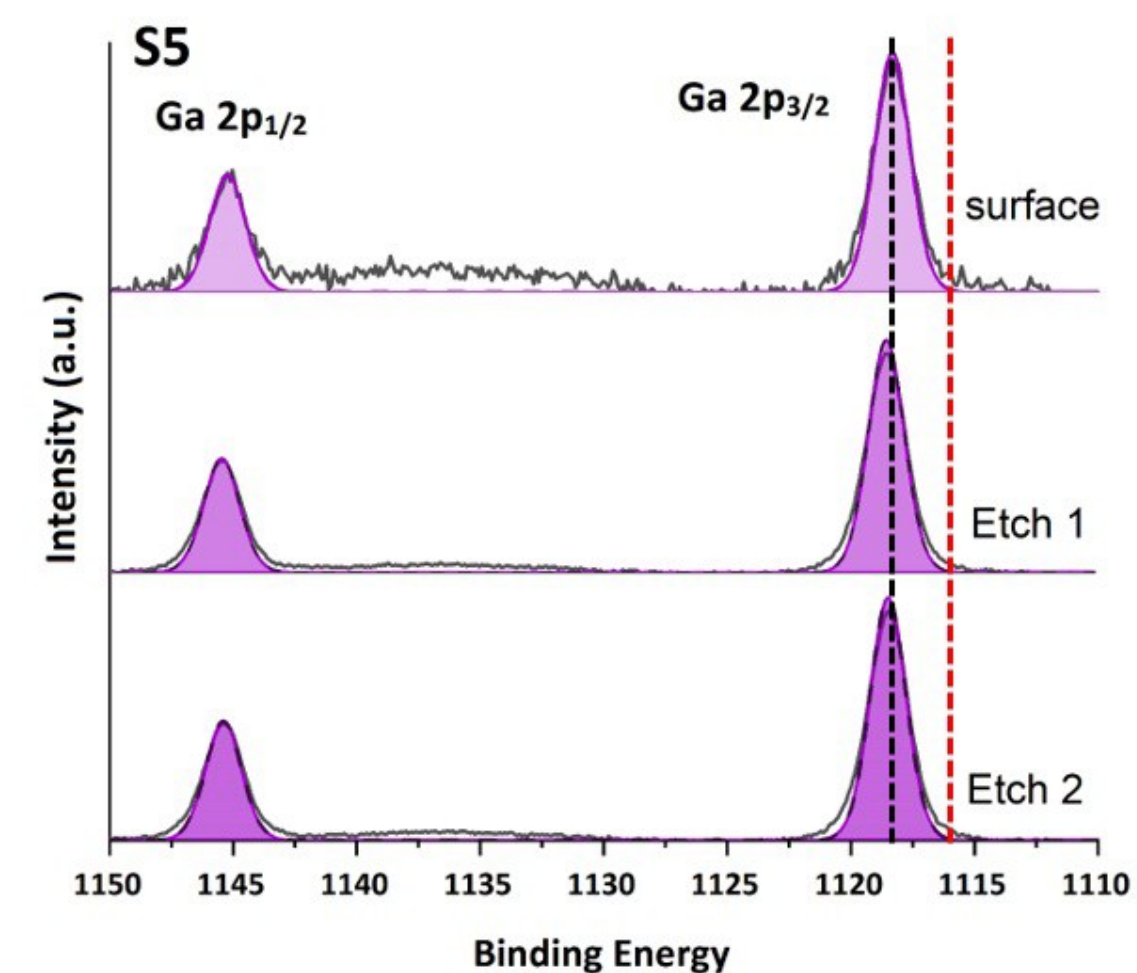

Supplement: d0sc00502a7.pdf [file d0sc00502a7.pdf]
